# Supplementary material for: Impact of Lactic Acid Bacteria Fermentation on (Poly)Phenolic Profile and In Vitro Antioxidant and Anti-Inflammatory Properties of Herbal Infusions
Source: MDPI journal article supplement (doi:10.3390/antiox13050562), 2024-05-02
Supplement: s1 [file s1]

# Impact of lactic acid bacteria fermentation on (poly)phenolic profile and *in vitro* antioxidant and anti-inflammatory properties of novel herbal infusions

Tarik Ozturk<sup>1‡</sup>, María Ángeles Ávila-Gálvez<sup>2‡</sup>, Sylvie Mercier<sup>3‡</sup>, Fernando Vallejo<sup>2</sup>, Alexis Bred<sup>3</sup>, Didier Fraisse<sup>3</sup>, Christine Morand<sup>3</sup>, Ebru Pelvan<sup>1</sup>, Laurent-Emmanuel Monfoulet<sup>3\*</sup> and Antonio González-Sarrias<sup>2\*</sup>

## Supplementary Materials

**Supplementary Table S1.** pH values of lacto-fermented herbal teas.

| Plant Material   | Basas (BF) | Strain A  | Strain B  |
|------------------|------------|-----------|-----------|
| Thyme            | 6.52±0.02  | 4.23±0.02 | 4.21±0.01 |
| Pomegranate Peel | 5.22±0.02  | 3.85±0.01 | 3.71±0.02 |
| Rosemary         | 6.81±0.03  | 4.15±0.02 | 4.03±0.03 |
| Echinacea        | 5.38±0.03  | 3.55±0.01 | 3.50±0.01 |

The data expressed as average ± SD (n=3), BF, before fermentation.

**Supplementary Table S2.** Content of phenolics in the various plant material used in this study

| Plant material      | RT        | m/z  | MS/MS       | Phenolic                                      | mg/g extract |
|---------------------|-----------|------|-------------|-----------------------------------------------|--------------|
| Thyme               | 12.69     | 447  | 285/267     | Luteolin glucoside                            | 16.49±1.97   |
|                     | 12.87     | 461  | 355/285     | Chrysoeriol glucoside                         | 109±1.00     |
|                     | 14.30     | 287  | 259/201/243 | Eriodictyol                                   | 75.46±0.29   |
|                     | 14.77     | 359  | 223/197/161 | Rosmarinic acid <sup>a</sup>                  | 35.14±0.21   |
|                     | 14.93     | 301  | 255/239     | Quercetin <sup>a</sup>                        | 6.49±0.02    |
|                     | 15.64     | 537  | 313/295     | Salvianolic acid A                            | 4.74±0.47    |
| Rosemary            | 13.29     | 477  | 462/315/300 | Isorhamnetin-3- <i>O</i> -glucoside           | 25.10±0.24   |
|                     | 14.53     | 461  | 341/299/283 | Hispidulin-7- <i>O</i> -glucoside             | 10.37±0.12   |
|                     | 14.78     | 359  | 223/197/161 | Rosmarinic acid <sup>a</sup>                  | 19.29±0.14   |
|                     | 14.92     | 609  | 463/301     | Hesperidin <sup>a</sup>                       | 12.94±0.14   |
|                     | 16.20     | 503  | 443/399/285 | Luteo-<br>lin-3-acetyl- <i>O</i> -glucuronide | 9.09±0.07    |
|                     | 16.46     | 447  | 443/399/285 | Luteolin glucoside                            | 25.33±4.75   |
|                     | 16.81     | 623  | 477/315/300 | Isorhamnetin-3- <i>O</i> -rutinoside          | 14.10±0.09   |
|                     | 22.02     | 345  | 301/283/259 | Rosmanol peak1                                | 0.87±0.01    |
|                     | 22.76     | 345  | 301/283/258 | Rosmanol peak 2                               | 1.61±0.01    |
|                     | 27.10     | 331  | 286         | Carnosic acid                                 | 1.83±0.06    |
|                     |           |      |             |                                               |              |
| Echinacea           | 6.98      | 311  | 197/149     | Caftaric acid                                 | 12.29±0.14   |
|                     | 8.22      | 353  | 311/191     | Chlorogenic acid                              | 1.20±0.13    |
|                     | 9.21      | 353  | 312/191/179 | Neochlorogenic acid                           | 1.15±0.08    |
|                     | 10.09     | 179  | 157/135     | Caffeic acid <sup>a</sup>                     | 0.84±0.06    |
|                     | 12.66     | 473  | 311/293/149 | Chicoric acid <sup>a</sup>                    | 49.11±0.52   |
|                     | 14.68     | 487  | 325/293/285 | Feruloylcaffeoyltartaric acid 1               | 2.34±0.29    |
|                     | 14.93     | 487  | 325/293/179 | Feruloylcaffeoyltartaric acid 2               | 1.48±0.04    |
| Pomegranate<br>peel | 4.5       | 781  | 721/601/575 | Punicalin <sup>a</sup>                        | 17.36±2.61   |
|                     | 6.89/8.24 | 1083 | 781/721/601 | Punicalagin isomers <sup>a</sup>              | 80.53±8.19   |
|                     | 8.66      | 799  | 479/391/301 | Ellagic acid derivative                       | 3.04±0.38    |
|                     | 9.24      | 801  | 649/347/301 | Punigluconin                                  | 2.55±0.11    |
|                     | 9.56      | 785  | 633/483/301 | Pedunculagin II                               | 2.06±0.25    |
|                     | 10.19     | 633  | 463/301/275 | Galloyl-HHDP-hexose                           | 4.87±0.87    |
|                     | 10.50     | 463  | 301         | Ellagic acid-hex                              | 17.33±1.67   |
|                     | 10.99     | 601  | 299/271     | Gallagic acid                                 | 15.80±3.21   |
|                     | 11.39     | 951  | 915/613/445 | Granatin-B                                    | 1.78±0.37    |
|                     | 11.92     | 433  | 388/313/301 | Ellagic acid-pentose                          | 1.54±0.08    |
|                     | 12.20     | 447  | 301/257/229 | Ellagic acid-deoxyhexose                      | 6.60±0.23    |
|                     | 12.40     | 301  | 284/257/229 | Ellagic acid <sup>a</sup>                     | 59.01±5.84   |

<sup>a</sup>Identified and quantified with their authentical standard. RT: retention time.

**Supplementary Table S3.** Pearson correlations (*r* value) and *p* values in thyme infusions between the total phenolic content (TPC) and individual (poly)phenolics detected with the three pro-inflammatory markers (IL-6, IL-8 and PGE<sub>2</sub>) and antioxidant activities measured by DPPH, FRAP and XO inhibition.

| Phenolic              | IL-6           | IL-6           | IL-8           | IL-8           | PGE <sub>2</sub> | PGE <sub>2</sub> | DPPH           | DPPH           | FRAP           | FRAP           | XO             | XO             |
|-----------------------|----------------|----------------|----------------|----------------|------------------|------------------|----------------|----------------|----------------|----------------|----------------|----------------|
|                       | <i>r</i> value | <i>p</i> value | <i>r</i> value | <i>p</i> value | <i>r</i> value   | <i>p</i> value   | <i>r</i> value | <i>p</i> value | <i>r</i> value | <i>r</i> value | <i>r</i> value | <i>p</i> value |
| TPC                   | -0.972         | 0.001          | -0.973         | 0.001          | -0.972           | 0.001            | 0.954          | 0.003          | -0.148         | 0.780          | -0.976         | 0.000          |
| Luteolin glucoside    | -0.992         | 0.926          | -0.992         | 0.926          | -0.992           | 0.927            | 0.998          | 0.041          | -0.488         | 0.326          | -0.990         | 0.000          |
| Chrysoeriol glucoside | -0.945         | 0.004          | -0.945         | 0.004          | -0.945           | 0.004            | 0.921          | 0.009          | -0.0519        | 0.922          | -0.951         | 0.003          |
| Eriodictyol           | -0.937         | 0.006          | -0.937         | 0.006          | -0.937           | 0.006            | 0.959          | 0.002          | -0.674         | 0.142          | -0.931         | 0.007          |
| Rosmarinic acid       | 0.108          | 0.837          | 0.109          | 0.837          | 0.109            | 0.837            | -0.176         | 0.738          | 0.962          | 0.002          | 0.091          | 0.864          |
| Quercetin             | -0.939         | 0.005          | -0.939         | 0.005          | -0.939           | 0.005            | 0.961          | 0.002          | -0.670         | 0.145          | -0.933         | 0.006          |

**Supplementary Table S4.** Pearson correlations (r value) and *p* values in rosemary infusions between the total phenolic content (TPC) and individual (poly)phenolics detected with the three pro-inflammatory markers (IL-6, IL-8 and PGE<sub>2</sub>) and antioxidant activities measured by DPPH, FRAP and XO inhibition.

| Phenolic                        | IL-6    | IL-6           | IL-8    | IL-8           | PGE <sub>2</sub> | PGE <sub>2</sub> | DPPH    | DPPH           | FRAP    | FRAP    | XO      | XO             |
|---------------------------------|---------|----------------|---------|----------------|------------------|------------------|---------|----------------|---------|---------|---------|----------------|
|                                 | r value | <i>p</i> value | r value | <i>p</i> value | r value          | <i>p</i> value   | r value | <i>p</i> value | r value | r value | r value | <i>p</i> value |
| TPC                             | 0.073   | 0.890          | 0.073   | 0.890          | 0.073            | 0.890            | -0.099  | 0.852          | 0.089   | 0.866   | 0.061   | 0.907          |
| Isorhamnetin-3-glucoside        | -0.536  | 0.273          | -0.535  | 0.273          | -0.535           | 0.273            | 0.513   | 0.297          | 0.665   | 0.149   | -0.545  | 0.263          |
| Hispidulin-7-O-glucoside        | -0.978  | 0.000          | -0.978  | 0.000          | -0.978           | 0.000            | 0.973   | 0.001          | 0.999   | 0.0170  | -0.981  | 0.000          |
| Rosmarinic acid*                | -0.364  | 0.478          | -0.364  | 0.478          | -0.364           | 0.478            | 0.388   | 0.447          | 0.208   | 0.692   | -0.353  | 0.492          |
| Hesperidin*                     | -0.929  | 0.007          | -0.929  | 0.007          | -0.929           | 0.007            | 0.919   | 0.009          | 0.977   | 0.000   | -0.933  | 0.006          |
| Luteolin-3-acetyl-O-glucuronide | -0.995  | 0.428          | -0.995  | 0.428          | -0.995           | 0.428            | 0.997   | 0.136          | 0.965   | 0.002   | -0.993  | 0.065          |
| Luteolin glucoside              | -0.935  | 0.006          | -0.935  | 0.006          | -0.935           | 0.006            | 0.926   | 0.008          | 0.980   | 0.000   | -0.939  | 0.005          |
| Isorhamnetin-3-O-rutinoside     | -0.969  | 0.001          | -0.969  | 0.001          | -0.969           | 0.001            | 0.962   | 0.002          | 0.996   | 0.202   | -0.972  | 0.001          |
| Rosmanol peak1                  | -0.939  | 0.005          | -0.939  | 0.005          | -0.939           | 0.005            | 0.930   | 0.007          | 0.982   | 0.000   | -0.943  | 0.005          |
| Rosmanol peak 2                 | -0.958  | 0.003          | -0.958  | 0.003          | -0.9580          | 0.003            | 0.950   | 0.004          | 0.992   | 0.000   | -0.961  | 0.002          |

**Supplementary Table S5.** Pearson correlations (r value) and *p* values in echinace infusions between the total phenolic content (TPC) and individual (poly)phenolics detected with the three pro-inflammatory markers (IL-6, IL-8 and PGE<sub>2</sub>) and antioxidant activities measured by DPPH, FRAP and XO inhibition.

| Phenolic                        | IL-6    | IL-6           | IL-8    | IL-8           | PGE <sub>2</sub> | PGE <sub>2</sub> | DPPH    | DPPH           | FRAP    | FRAP    | XO      | XO             |
|---------------------------------|---------|----------------|---------|----------------|------------------|------------------|---------|----------------|---------|---------|---------|----------------|
|                                 | r value | <i>p</i> value | r value | <i>p</i> value | r value          | <i>p</i> value   | r value | <i>p</i> value | r value | r value | r value | <i>p</i> value |
| TPC                             | -0.999  | 0.026          | -0.999  | 0.026          | -0.999           | 0.026            | 0.999   | 0.000          | 0.999   | 0.002   | 0.937   | 0.006          |
| Caftaric acid                   | -0.715  | 0.110          | -0.715  | 0.110          | -0.715           | 0.110            | 0.695   | 0.125          | 0.714   | 0.111   | 0.379   | 0.459          |
| Chlorogenic acid                | -0.629  | 0.181          | -0.629  | 0.181          | -0.629           | 0.181            | 0.651   | 0.161          | 0.630   | 0.180   | 0.886   | 0.019          |
| Neochlorogenic acid             | -0.616  | 0.193          | -0.616  | 0.193          | -0.616           | 0.193            | 0.592   | 0.215          | 0.614   | 0.195   | 0.251   | 0.630          |
| Caffeic acid                    | -0.001  | 0.999          | -0.001  | 0.999          | -0.001           | 0.999            | 0.029   | 0.966          | 0.002   | 0.997   | 0.397   | 0.435          |
| Chicoric acid                   | -0.476  | 0.340          | -0.476  | 0.340          | -0.476           | 0.340            | 0.450   | 0.371          | 0.474   | 0.343   | 0.087   | 0.870          |
| Feruloylcaffeoyltartaric acid 1 | -0.500  | 0.312          | -0.500  | 0.312          | -0.500           | 0.312            | 0.475   | 0.341          | 0.499   | 0.315   | 0.115   | 0.829          |
| Feruloylcaffeoyltartaric acid 2 | -0.500  | 0.312          | -0.500  | 0.312          | -0.500           | 0.312            | 0.475   | 0.341          | 0.499   | 0.315   | 0.115   | 0.829          |

**Supplementary Table S6.** Pearson correlations (*r* value) and *p* values in pomegranate peel infusions between the total phenolic content (TPC) and individual (poly)phenolics detected with the three pro-inflammatory markers (IL-6, IL-8 and PGE<sub>2</sub>) and antioxidant activities measured by DPPH, FRAP and XO inhibition.

| Phenolic             | IL-6           | IL-6           | IL-8           | IL-8           | PGE <sub>2</sub> | PGE <sub>2</sub> | DPPH           | DPPH           | FRAP           | FRAP           | XO             | XO             |
|----------------------|----------------|----------------|----------------|----------------|------------------|------------------|----------------|----------------|----------------|----------------|----------------|----------------|
|                      | <i>r</i> value | <i>p</i> value | <i>r</i> value | <i>p</i> value | <i>r</i> value   | <i>p</i> value   | <i>r</i> value | <i>p</i> value | <i>r</i> value | <i>r</i> value | <i>r</i> value | <i>p</i> value |
| TPC                  | -0.998         | 0.057          | -0.998         | 0.057          | -0.998           | 0.006            | 0.211          | 0.688          | 0.352          | 0.493          | -0.700         | 0.121          |
| Punicalin            | 0.995          | 0.456          | 0.994          | 0.456          | 0.995            | 0.456            | -0.170         | 0.748          | -0.312         | 0.547          | 0.730          | 0.0993         |
| Punicalagin isomers  | 0.257          | 0.623          | 0.257          | 0.623          | 0.257            | 0.623            | 0.860          | 0.028          | 0.776          | 0.0696         | 0.899          | 0.015          |
| Punigluconin         | 0.979          | 0.000          | 0.979          | 0.000          | 0.979            | 0.000            | -0.069         | 0.897          | -0.214         | 0.684          | 0.796          | 0.059          |
| Pedunculagin II      | -0.991         | 0.000          | -0.991         | 0.000          | -0.991           | 0.000            | 0.398          | 0.434          | 0.528          | 0.281          | -0.548         | 0.261          |
| Galloyl-HHDP-hexose  | -0.945         | 0.004          | -0.945         | 0.004          | -0.945           | 0.0045           | -0.058         | 0.913          | 0.089          | 0.867          | -0.866         | 0.026          |
| Ellagic acid-hex     | -0.999         | 0.000          | -0.999         | 0.000          | -0.999           | 0.000            | 0.285          | 0.584          | 0.423          | 0.404          | -0.644         | 0.167          |
| Gallagic acid        | -0.999         | 0.001          | -0.999         | 0.001          | -0.999           | 0.010            | 0.233          | 0.657          | 0.373          | 0.467          | -0.684         | 0.133          |
| Granatin-B           | -0.982         | 0.000          | -0.982         | 0.000          | -0.982           | 0.000            | 0.087          | 0.870          | 0.232          | 0.658          | -0.784         | 0.065          |
| Ellagic acid-pentose | -0.989         | 0.000          | -0.989         | 0.000          | -0.989           | 0.000            | 0.126          | 0.812          | 0.267          | 0.605          | -0.760         | 0.080          |
| Ellagic acid         | -0.993         | 0.647          | -0.993         | 0.647          | -0.993           | 0.648            | 0.160          | 0.762          | 0.303          | 0.560          | -0.737         | 0.095          |
